# Supplementary material for: Parallel transmit improves 7T MRI adult epilepsy pre-surgical evaluation
Source: bioRxiv or medRxiv preprint supplement (doi:10.1101/2024.10.28.24316232), 2024-11-01
Supplement: Supplementary file [file media-1.pdf]

\\USER\WBIC Protocols Ready\Protocol 569\P00569\_Epilepsy\_20230628\AAHead\_Scout\_32ch-head-coil

TA: 0:18 PM: REF Voxel size: 1.6×1.6×1.6 mmPAT: 3 Rel. SNR: 1.00 : fl

### Properties

|                                               |                    |
|-----------------------------------------------|--------------------|
| Prio recon                                    | Off                |
| Load images to viewer                         | On                 |
| Inline movie                                  | Off                |
| Auto store images                             | On                 |
| Load images to stamp segments                 | Off                |
| Load images to graphic segments               | On                 |
| Auto open inline display                      | Off                |
| Auto close inline display                     | Off                |
| Start measurement without further preparation | Off                |
| Wait for user to start                        | Off                |
| Start measurements                            | Single measurement |

### Routine

|                    |                    |
|--------------------|--------------------|
| Slab group         | 1                  |
| Slabs              | 1                  |
| Dist. factor       | 20 %               |
| Position           | L0.0 A0.5 H16.3 mm |
| Orientation        | Sagittal           |
| Phase enc. dir.    | A >> P             |
| Phase oversampling | 0 %                |
| Slice oversampling | 0.0 %              |
| Slices per slab    | 128                |
| FoV read           | 260 mm             |
| FoV phase          | 100.0 %            |
| Slice thickness    | 1.6 mm             |
| TR                 | 4.17 ms            |
| TE                 | 1.53 ms            |
| Averages           | 1                  |
| Concatenations     | 1                  |
| Filter             | B1 filter          |
| Coil elements      | AC                 |

### Contrast - Common

|            |         |
|------------|---------|
| TR         | 4.17 ms |
| TE         | 1.53 ms |
| Flip angle | 16 deg  |

### Contrast - Dynamic

|                |            |
|----------------|------------|
| Averages       | 1          |
| Averaging mode | Short term |
| Reconstruction | Magnitude  |
| Measurements   | 1          |

### Resolution - Common

|                       |           |
|-----------------------|-----------|
| FoV read              | 260 mm    |
| FoV phase             | 100.0 %   |
| Slice thickness       | 1.6 mm    |
| Base resolution       | 160       |
| Phase resolution      | 100 %     |
| Slice resolution      | 69 %      |
| Phase partial Fourier | 6/8       |
| Slice partial Fourier | 6/8       |
| Trajectory            | Cartesian |

### Resolution - iPAT

|                  |        |
|------------------|--------|
| PAT mode         | GRAPPA |
| Accel. factor PE | 3      |
| Ref. lines PE    | 24     |

### Resolution - iPAT

|                     |            |
|---------------------|------------|
| Accel. factor 3D    | 1          |
| Reference scan mode | Integrated |

### Resolution - Filter Image

|                   |     |
|-------------------|-----|
| Image Filter      | Off |
| Distortion Corr.  | Off |
| Prescan Normalize | Off |
| Normalize         | Off |
| B1 filter         | On  |
| Unfiltered images | Off |

### Resolution - Filter Rawdata

|                   |     |
|-------------------|-----|
| Raw filter        | Off |
| Elliptical filter | Off |

### Geometry - Common

|                    |                    |
|--------------------|--------------------|
| Slab group         | 1                  |
| Slabs              | 1                  |
| Dist. factor       | 20 %               |
| Position           | L0.0 A0.5 H16.3 mm |
| Orientation        | Sagittal           |
| Phase enc. dir.    | A >> P             |
| Slice oversampling | 0.0 %              |
| Slices per slab    | 128                |
| FoV read           | 260 mm             |
| FoV phase          | 100.0 %            |
| Slice thickness    | 1.6 mm             |
| TR                 | 4.17 ms            |
| Multi-slice mode   | Sequential         |
| Series             | Ascending          |
| Concatenations     | 1                  |

### Geometry - AutoAlign

|                     |                    |
|---------------------|--------------------|
| Slab group          | 1                  |
| Position            | L0.0 A0.5 H16.3 mm |
| Orientation         | Sagittal           |
| Phase enc. dir.     | A >> P             |
| Initial Position    | Isocenter          |
| L                   | 0.0 mm             |
| P                   | 0.0 mm             |
| H                   | 0.0 mm             |
| Initial Rotation    | 0.00 deg           |
| Initial Orientation | Transversal        |

### Geometry - Tim Planning Suite

|                   |      |
|-------------------|------|
| Set-n-Go Protocol | Off  |
| Table position    | H    |
| Table position    | 0 mm |
| Inline Composing  | Off  |

### System - Miscellaneous

|                   |                  |
|-------------------|------------------|
| Positioning mode  | REF              |
| Table position    | H                |
| Table position    | 0 mm             |
| MSMA              | S - C - T        |
| Sagittal          | R >> L           |
| Coronal           | A >> P           |
| Transversal       | F >> H           |
| Coil Combine Mode | Adaptive Combine |

**System - Miscellaneous**

|                     |         |
|---------------------|---------|
| Save uncombined     | Off     |
| Matrix Optimization | Off     |
| Coil Select Mode    | Default |

**System - Adjustments**

|                          |          |
|--------------------------|----------|
| B0 Shim mode             | Tune up  |
| B1 Shim mode             | TrueForm |
| Confirm freq. adjustment | Off      |
| Assume Dominant Fat      | Off      |
| Assume Silicone          | Off      |
| Adjustment Tolerance     | Auto     |

**System - Adjust Volume**

|             |             |
|-------------|-------------|
| Position    | Isocenter   |
| Orientation | Transversal |
| Rotation    | 0.00 deg    |
| A >> P      | 263 mm      |
| R >> L      | 350 mm      |
| F >> H      | 350 mm      |
| Reset       | Off         |

**System - pTx Volumes**

|              |          |
|--------------|----------|
| B1 Shim mode | TrueForm |
| Excitation   | Non-sel. |

**System - Tx/Rx**

|                     |                |
|---------------------|----------------|
| Frequency 1H        | 297.231131 MHz |
| Correction factor   | 1              |
| Gain                | High           |
| Img. Scale Cor.     | 1.000          |
| Reset               | Off            |
| ? Ref. amplitude 1H | 0.000 V        |

**Physio - PACE**

|                |     |
|----------------|-----|
| Resp. control  | Off |
| Concatenations | 1   |

**Inline - Common**

|                |        |
|----------------|--------|
| Flip angle     | 16 deg |
| Measurements   | 1      |
| Time to center | 7.7 s  |

**Inline - Inline**

|                      |     |
|----------------------|-----|
| Subtract             | Off |
| Measurements         | 1   |
| StdDev               | Off |
| Save original images | On  |

**Inline - MIP**

|                      |     |
|----------------------|-----|
| MIP-Sag              | Off |
| MIP-Cor              | Off |
| MIP-Tra              | Off |
| MIP-Time             | Off |
| Save original images | On  |

**Inline - Composing**

|                  |     |
|------------------|-----|
| Inline Composing | Off |
| Distortion Corr. | Off |

**Inline - MapIt**

|                      |        |
|----------------------|--------|
| Save original images | On     |
| MapIt                | None   |
| Flip angle           | 16 deg |

**Inline - MapIt**

|              |         |
|--------------|---------|
| Measurements | 1       |
| Contrasts    | 1       |
| TR           | 4.17 ms |
| TE           | 1.53 ms |

**Sequence - Part 1**

|                  |            |
|------------------|------------|
| Introduction     | On         |
| Dimension        | 3D         |
| Asymmetric echo  | Weak       |
| Contrasts        | 1          |
| Multi-slice mode | Sequential |
| Bandwidth        | 540 Hz/Px  |

**Sequence - Part 2**

|               |          |
|---------------|----------|
| RF pulse type | Fast     |
| Gradient mode | Normal   |
| Excitation    | Non-sel. |
| RF spoiling   | On       |

**Sequence - Assistant**

|      |     |
|------|-----|
| Mode | Off |
|------|-----|

\\USER\WBIC Protocols Ready\Protocol 569\P00569\_Epilepsy\_20230628\flair\_ns\_tse\_vfl\_0.8iso\_sag\_UP

TA: 6:54 PM: FIX Voxel size: 0.8x0.8x0.8 mmPAT: 6 Rel. SNR: 1.00 : spcir

### Properties

|                                               |                    |
|-----------------------------------------------|--------------------|
| Prio recon                                    | Off                |
| Load images to viewer                         | On                 |
| Inline movie                                  | Off                |
| Auto store images                             | On                 |
| Load images to stamp segments                 | Off                |
| Load images to graphic segments               | Off                |
| Auto open inline display                      | Off                |
| Auto close inline display                     | Off                |
| Start measurement without further preparation | Off                |
| Wait for user to start                        | Off                |
| Start measurements                            | Single measurement |

### Routine

|                    |            |
|--------------------|------------|
| Slab group         | 1          |
| Slabs              | 1          |
| Position           | Isocenter  |
| Orientation        | Sagittal   |
| Phase enc. dir.    | A >> P     |
| AutoAlign          | ---        |
| Phase oversampling | 0 %        |
| Slice oversampling | 0.0 %      |
| Slices per slab    | 192        |
| FoV read           | 230 mm     |
| FoV phase          | 100.0 %    |
| Slice thickness    | 0.80 mm    |
| TR                 | 9000 ms    |
| TE                 | 326 ms     |
| Averages           | 1.0        |
| Concatenations     | 1          |
| Filter             | Raw filter |
| Coil elements      | AC         |

### Contrast - Common

|                   |                |
|-------------------|----------------|
| TR                | 9000 ms        |
| TE                | 326 ms         |
| MTC               | Off            |
| Magn. preparation | Non-sel. T2-IR |
| TI                | 2300 ms        |
| T2prep duration   | 100 ms         |
| Fat suppr.        | None           |
| Blood suppr.      | Off            |
| Restore magn.     | Off            |

### Contrast - Dynamic

|                 |                  |
|-----------------|------------------|
| Averages        | 1.0              |
| Reconstruction  | Magnitude        |
| Measurements    | 1                |
| Multiple series | Each measurement |

### Resolution - Common

|                       |         |
|-----------------------|---------|
| FoV read              | 230 mm  |
| FoV phase             | 100.0 % |
| Slice thickness       | 0.80 mm |
| Base resolution       | 288     |
| Phase resolution      | 100 %   |
| Slice resolution      | 100 %   |
| Phase partial Fourier | Allowed |
| Slice partial Fourier | Off     |

### Resolution - Common

|               |     |
|---------------|-----|
| Interpolation | Off |
|---------------|-----|

### Resolution - iPAT

|                     |            |
|---------------------|------------|
| PAT mode            | CAIPIRINHA |
| Accel. factor PE    | 3          |
| Ref. lines PE       | 32         |
| Accel. factor 3D    | 2          |
| Ref. lines 3D       | 24         |
| Reordering Shift 3D | 1          |
| Reference scan mode | Integrated |

### Resolution - Filter Image

|                   |     |
|-------------------|-----|
| Image Filter      | Off |
| Distortion Corr.  | Off |
| Prescan Normalize | Off |
| Normalize         | Off |
| B1 filter         | Off |

### Resolution - Filter Rawdata

|                   |     |
|-------------------|-----|
| Raw filter        | On  |
| Elliptical filter | Off |

### Geometry - Common

|                    |           |
|--------------------|-----------|
| Slab group         | 1         |
| Slabs              | 1         |
| Position           | Isocenter |
| Orientation        | Sagittal  |
| Phase enc. dir.    | A >> P    |
| Slice oversampling | 0.0 %     |
| Slices per slab    | 192       |
| FoV read           | 230 mm    |
| FoV phase          | 100.0 %   |
| Slice thickness    | 0.80 mm   |
| TR                 | 9000 ms   |
| Series             | Ascending |
| Concatenations     | 1         |

### Geometry - AutoAlign

|                     |           |
|---------------------|-----------|
| Slab group          | 1         |
| Position            | Isocenter |
| Orientation         | Sagittal  |
| Phase enc. dir.     | A >> P    |
| AutoAlign           | ---       |
| Initial Position    | Isocenter |
| L                   | 0.0 mm    |
| P                   | 0.0 mm    |
| H                   | 0.0 mm    |
| Initial Rotation    | 0.00 deg  |
| Initial Orientation | Sagittal  |

### Geometry - Saturation

|               |      |
|---------------|------|
| Fat suppr.    | None |
| Restore magn. | Off  |
| Special sat.  | None |

### Geometry - Navigator

**Geometry - Tim Planning Suite**

|                   |      |
|-------------------|------|
| Set-n-Go Protocol | Off  |
| Table position    | H    |
| Table position    | 0 mm |
| Inline Composing  | Off  |

**System - Miscellaneous**

|                     |                  |
|---------------------|------------------|
| Positioning mode    | FIX              |
| Table position      | H                |
| Table position      | 0 mm             |
| MSMA                | S - C - T        |
| Sagittal            | R >> L           |
| Coronal             | A >> P           |
| Transversal         | F >> H           |
| Coil Combine Mode   | Adaptive Combine |
| Save uncombined     | Off              |
| Matrix Optimization | Off              |
| AutoAlign           | ---              |
| Coil Select Mode    | Default          |

**System - Adjustments**

|                          |          |
|--------------------------|----------|
| B0 Shim mode             | Brain    |
| B1 Shim mode             | TrueForm |
| Confirm freq. adjustment | Off      |
| Assume Dominant Fat      | Off      |
| Assume Silicone          | Off      |
| Adjustment Tolerance     | Auto     |

**System - Adjust Volume**

|               |                    |
|---------------|--------------------|
| ! Position    | R0.9 P9.8 H15.0 mm |
| ! Orientation | T > C-16.4 > S-1.3 |
| ! Rotation    | 2.64 deg           |
| ! A >> P      | 163 mm             |
| ! R >> L      | 160 mm             |
| ! F >> H      | 111 mm             |
| Reset         | Off                |

**System - pTx Volumes**

|              |          |
|--------------|----------|
| B1 Shim mode | TrueForm |
| Excitation   | Non-sel. |

**System - Tx/Rx**

|                     |                |
|---------------------|----------------|
| Frequency 1H        | 297.231131 MHz |
| Correction factor   | 1              |
| Gain                | High           |
| Img. Scale Cor.     | 1.000          |
| Reset               | Off            |
| ? Ref. amplitude 1H | 0.000 V        |

**Physio - Signal1**

|                 |         |
|-----------------|---------|
| 1st Signal/Mode | None    |
| Trigger delay   | 0 ms    |
| TR              | 9000 ms |
| Concatenations  | 1       |

**Physio - Cardiac**

|                   |                |
|-------------------|----------------|
| Magn. preparation | Non-sel. T2-IR |
| T1                | 2300 ms        |
| T2prep duration   | 100 ms         |
| Fat suppr.        | None           |
| Dark blood        | Off            |
| FoV read          | 230 mm         |
| FoV phase         | 100.0 %        |
| Phase resolution  | 100 %          |

**Physio - PACE**

|                |     |
|----------------|-----|
| Resp. control  | Off |
| Concatenations | 1   |

**Inline - Common**

|                      |     |
|----------------------|-----|
| Subtract             | Off |
| Measurements         | 1   |
| StdDev               | Off |
| Save original images | On  |

**Inline - MIP**

|                      |     |
|----------------------|-----|
| MIP-Sag              | Off |
| MIP-Cor              | Off |
| MIP-Tra              | Off |
| MIP-Time             | Off |
| Save original images | On  |

**Inline - Composing**

|                  |     |
|------------------|-----|
| Inline Composing | Off |
| Distortion Corr. | Off |

**Sequence - Part 1**

|                     |           |
|---------------------|-----------|
| Introduction        | Off       |
| Dimension           | 3D        |
| Elliptical scanning | Off       |
| Reordering          | Linear    |
| Flow comp.          | No        |
| Echo spacing        | 5.48 ms   |
| Bandwidth           | 294 Hz/Px |

**Sequence - Part 2**

|                     |          |
|---------------------|----------|
| Echo train duration | 915 ms   |
| Gradient mode       | Fast     |
| Excitation          | Non-sel. |
| Flip angle mode     | T2 var   |
| Turbo factor        | 218      |

**Sequence - pTX Pulses**

|                 |            |
|-----------------|------------|
| Universal Pulse | 1          |
| Pulse type      | Excitation |
| Trajectory      | External   |

**Sequence - Assistant**

|               |     |
|---------------|-----|
| Allowed delay | 0 s |
|---------------|-----|

\\USER\WBIC Protocols Ready\Protocol 569\P00569\_Epilepsy\_20230628\Highresolution\_TSE\_PAT3\_100\_CTR1

TA: 6:32 PM: REF Voxel size: 0.5×0.5×1.0 mmPAT: 3 Rel. SNR: 1.00 : qtse

### Properties

|                                               |                    |
|-----------------------------------------------|--------------------|
| Prio recon                                    | Off                |
| Load images to viewer                         | On                 |
| Inline movie                                  | Off                |
| Auto store images                             | On                 |
| Load images to stamp segments                 | Off                |
| Load images to graphic segments               | Off                |
| Auto open inline display                      | Off                |
| Auto close inline display                     | Off                |
| Start measurement without further preparation | Off                |
| Wait for user to start                        | Off                |
| Start measurements                            | Single measurement |

### Routine

|                    |                   |
|--------------------|-------------------|
| Slice group        | 1                 |
| Slices             | 120               |
| Dist. factor       | 10 %              |
| Position           | L0.0 P3.2 F8.5 mm |
| Orientation        | C > T-14.7 > S0.1 |
| Phase enc. dir.    | R >> L            |
| AutoAlign          | ---               |
| Phase oversampling | 0 %               |
| FoV read           | 244 mm            |
| FoV phase          | 100.0 %           |
| Slice thickness    | 1.0 mm            |
| TR                 | 8870.0 ms         |
| TE                 | 77 ms             |
| Averages           | 1                 |
| Concatenations     | 2                 |
| Filter             | Raw filter        |
| Coil elements      | AC                |

### Contrast - Common

|                   |           |
|-------------------|-----------|
| TR                | 8870.0 ms |
| TE                | 77 ms     |
| TD                | 0.0 ms    |
| MTC               | Off       |
| Magn. preparation | None      |
| Flip angle        | 60 deg    |
| Fat suppr.        | None      |
| Water suppr.      | None      |
| Restore magn.     | Off       |

### Contrast - Dynamic

|                 |                  |
|-----------------|------------------|
| Averages        | 1                |
| Averaging mode  | Short term       |
| Reconstruction  | Magnitude        |
| Measurements    | 1                |
| Multiple series | Each measurement |

### Resolution - Common

|                       |           |
|-----------------------|-----------|
| FoV read              | 244 mm    |
| FoV phase             | 100.0 %   |
| Slice thickness       | 1.0 mm    |
| Base resolution       | 512       |
| Phase resolution      | 100 %     |
| Phase partial Fourier | Off       |
| Trajectory            | Cartesian |
| Interpolation         | Off       |

### Resolution - iPAT

|                     |            |
|---------------------|------------|
| PAT mode            | GRAPPA     |
| Accel. factor PE    | 3          |
| Ref. lines PE       | 27         |
| Reference scan mode | Integrated |

### Resolution - Filter Image

|                   |     |
|-------------------|-----|
| Image Filter      | Off |
| Distortion Corr.  | Off |
| Prescan Normalize | Off |
| Normalize         | Off |
| B1 filter         | Off |

### Resolution - Filter Rawdata

|                   |     |
|-------------------|-----|
| Raw filter        | On  |
| Elliptical filter | Off |

### Geometry - Common

|                  |                   |
|------------------|-------------------|
| Slice group      | 1                 |
| Slices           | 120               |
| Dist. factor     | 10 %              |
| Position         | L0.0 P3.2 F8.5 mm |
| Orientation      | C > T-14.7 > S0.1 |
| Phase enc. dir.  | R >> L            |
| FoV read         | 244 mm            |
| FoV phase        | 100.0 %           |
| Slice thickness  | 1.0 mm            |
| TR               | 8870.0 ms         |
| Multi-slice mode | Interleaved       |
| Series           | Interleaved       |
| Concatenations   | 2                 |

### Geometry - AutoAlign

|                     |                   |
|---------------------|-------------------|
| Slice group         | 1                 |
| Position            | L0.0 P3.2 F8.5 mm |
| Orientation         | C > T-14.7 > S0.1 |
| Phase enc. dir.     | R >> L            |
| AutoAlign           | ---               |
| Initial Position    | L0.0 P3.2 F8.5    |
| R                   | 0.0 mm            |
| P                   | 3.2 mm            |
| F                   | 8.5 mm            |
| Initial Rotation    | -1.30 deg         |
| Initial Orientation | C > T             |
| C > T               | -14.7             |
| > S                 | 0.1               |

### Geometry - Saturation

|               |      |
|---------------|------|
| Fat suppr.    | None |
| Water suppr.  | None |
| Restore magn. | Off  |
| Special sat.  | None |

### Geometry - Navigator

### Geometry - Tim Planning Suite

|                   |      |
|-------------------|------|
| Set-n-Go Protocol | Off  |
| Table position    | H    |
| Table position    | 0 mm |

**Geometry - Tim Planning Suite**

|                  |     |
|------------------|-----|
| Inline Composing | Off |
|------------------|-----|

**Geometry - Tim CT**

|                 |         |
|-----------------|---------|
| Tim CT mode     | Off     |
| Slices          | 120     |
| Slice thickness | 1.0 mm  |
| Dist. factor    | 10 %    |
| FoV read        | 244 mm  |
| FoV phase       | 100.0 % |

**System - Miscellaneous**

|                     |                |
|---------------------|----------------|
| Positioning mode    | REF            |
| Table position      | F              |
| Table position      | 0 mm           |
| MSMA                | S - C - T      |
| Sagittal            | R >> L         |
| Coronal             | A >> P         |
| Transversal         | F >> H         |
| Coil Combine Mode   | Sum of Squares |
| Save uncombined     | Off            |
| Matrix Optimization | Off            |
| AutoAlign           | ---            |
| Coil Select Mode    | Default        |

**System - Adjustments**

|                          |          |
|--------------------------|----------|
| B0 Shim mode             | Brain    |
| B1 Shim mode             | TrueForm |
| Confirm freq. adjustment | Off      |
| Assume Dominant Fat      | Off      |
| Assume Silicone          | Off      |
| Adjustment Tolerance     | Auto     |

**System - Adjust Volume**

|               |                    |
|---------------|--------------------|
| ! Position    | R0.9 P9.8 H15.0 mm |
| ! Orientation | T > C-16.4 > S-1.3 |
| ! Rotation    | 2.64 deg           |
| ! A >> P      | 163 mm             |
| ! R >> L      | 160 mm             |
| ! F >> H      | 111 mm             |
| Reset         | Off                |

**System - pTx Volumes**

|              |          |
|--------------|----------|
| B1 Shim mode | TrueForm |
|--------------|----------|

**System - Tx/Rx**

|                     |                |
|---------------------|----------------|
| Frequency 1H        | 297.231131 MHz |
| Correction factor   | 1              |
| Gain                | High           |
| Img. Scale Cor.     | 1.000          |
| Reset               | Off            |
| ? Ref. amplitude 1H | 0.000 V        |

**Physio - Signal1**

|                 |           |
|-----------------|-----------|
| 1st Signal/Mode | None      |
| TR              | 8870.0 ms |
| Concatenations  | 2         |

**Physio - Cardiac**

|                   |         |
|-------------------|---------|
| Magn. preparation | None    |
| Fat suppr.        | None    |
| Dark blood        | Off     |
| FoV read          | 244 mm  |
| FoV phase         | 100.0 % |

**Physio - Cardiac**

|                  |           |
|------------------|-----------|
| Phase resolution | 100 %     |
| Trajectory       | Cartesian |

**Physio - PACE**

|                |     |
|----------------|-----|
| Resp. control  | Off |
| Concatenations | 2   |

**Inline - Common**

|                      |     |
|----------------------|-----|
| Subtract             | Off |
| Measurements         | 1   |
| StdDev               | Off |
| Save original images | On  |

**Inline - MIP**

|                      |     |
|----------------------|-----|
| MIP-Sag              | Off |
| MIP-Cor              | Off |
| MIP-Tra              | Off |
| MIP-Time             | Off |
| Save original images | On  |

**Inline - Composing**

|                  |     |
|------------------|-----|
| Inline Composing | Off |
| Distortion Corr. | Off |

**Sequence - Part 1**

|                     |             |
|---------------------|-------------|
| Introduction        | On          |
| Dimension           | 2D          |
| Compensate T2 decay | Off         |
| Reduce Motion Sens. | Off         |
| Contrasts           | 1           |
| Flow comp.          | No          |
| Optimization        | In phase    |
| Multi-slice mode    | Interleaved |
| Free echo spacing   | On          |
| Echo spacing        | 15.3 ms     |
| Bandwidth           | 178 Hz/Px   |

**Sequence - Part 2**

|                          |              |
|--------------------------|--------------|
| Define                   | Turbo factor |
| Echo trains per slice    | 21           |
| Phase correction         | Automatic    |
| Acoustic noise reduction | Active       |
| RF pulse type            | Low SAR      |
| Gradient mode            | Normal       |
| Hyperecho                | On           |
| WARP                     | Off          |
| Red. EC sensitivity      | Off          |
| Turbo factor             | 9            |

**Sequence - Assistant**

|               |     |
|---------------|-----|
| Mode          | Off |
| Allowed delay | 0 s |

\\USER\WBIC Protocols Ready\Protocol 569\P00569\_Epilepsy\_20230628\t2\_ns\_tse\_vfl\_0.8iso\_sag\_UP

TA: 8:00 PM: FIX Voxel size: 0.8x0.8x0.8 mmPAT: 9 Rel. SNR: 1.00 : spc

**Properties**

|                                               |                    |
|-----------------------------------------------|--------------------|
| Prio recon                                    | Off                |
| Load images to viewer                         | On                 |
| Inline movie                                  | Off                |
| Auto store images                             | On                 |
| Load images to stamp segments                 | Off                |
| Load images to graphic segments               | Off                |
| Auto open inline display                      | Off                |
| Auto close inline display                     | Off                |
| Start measurement without further preparation | Off                |
| Wait for user to start                        | Off                |
| Start measurements                            | Single measurement |

**Routine**

|                    |            |
|--------------------|------------|
| Slab group         | 1          |
| Slabs              | 1          |
| Position           | Isocenter  |
| Orientation        | Sagittal   |
| Phase enc. dir.    | A >> P     |
| AutoAlign          | ---        |
| Phase oversampling | 0 %        |
| Slice oversampling | 0.0 %      |
| Slices per slab    | 240        |
| FoV read           | 230 mm     |
| FoV phase          | 100.0 %    |
| Slice thickness    | 0.80 mm    |
| TR                 | 12000 ms   |
| TE                 | 384 ms     |
| Averages           | 1.0        |
| Concatenations     | 1          |
| Filter             | Raw filter |
| Coil elements      | AC         |

**Contrast - Common**

|                   |          |
|-------------------|----------|
| TR                | 12000 ms |
| TE                | 384 ms   |
| MTC               | Off      |
| Magn. preparation | None     |
| Fat suppr.        | None     |
| Blood suppr.      | Off      |
| Restore magn.     | Off      |

**Contrast - Dynamic**

|                 |                  |
|-----------------|------------------|
| Averages        | 1.0              |
| Reconstruction  | Magnitude        |
| Measurements    | 1                |
| Multiple series | Each measurement |

**Resolution - Common**

|                       |         |
|-----------------------|---------|
| FoV read              | 230 mm  |
| FoV phase             | 100.0 % |
| Slice thickness       | 0.80 mm |
| Base resolution       | 288     |
| Phase resolution      | 100 %   |
| Slice resolution      | 100 %   |
| Phase partial Fourier | Allowed |
| Slice partial Fourier | Off     |
| Interpolation         | Off     |

**Resolution - iPAT**

|                     |            |
|---------------------|------------|
| PAT mode            | CAIPIRINHA |
| Accel. factor PE    | 3          |
| Ref. lines PE       | 32         |
| Accel. factor 3D    | 3          |
| Ref. lines 3D       | 24         |
| Reordering Shift 3D | 1          |
| Reference scan mode | Integrated |

**Resolution - Filter Image**

|                   |     |
|-------------------|-----|
| Image Filter      | Off |
| Distortion Corr.  | Off |
| Prescan Normalize | Off |
| Normalize         | Off |
| B1 filter         | Off |

**Resolution - Filter Rawdata**

|                   |     |
|-------------------|-----|
| Raw filter        | On  |
| Elliptical filter | Off |

**Geometry - Common**

|                    |           |
|--------------------|-----------|
| Slab group         | 1         |
| Slabs              | 1         |
| Position           | Isocenter |
| Orientation        | Sagittal  |
| Phase enc. dir.    | A >> P    |
| Slice oversampling | 0.0 %     |
| Slices per slab    | 240       |
| FoV read           | 230 mm    |
| FoV phase          | 100.0 %   |
| Slice thickness    | 0.80 mm   |
| TR                 | 12000 ms  |
| Series             | Ascending |
| Concatenations     | 1         |

**Geometry - AutoAlign**

|                     |           |
|---------------------|-----------|
| Slab group          | 1         |
| Position            | Isocenter |
| Orientation         | Sagittal  |
| Phase enc. dir.     | A >> P    |
| AutoAlign           | ---       |
| Initial Position    | Isocenter |
| L                   | 0.0 mm    |
| P                   | 0.0 mm    |
| H                   | 0.0 mm    |
| Initial Rotation    | 0.00 deg  |
| Initial Orientation | Sagittal  |

**Geometry - Saturation**

|               |      |
|---------------|------|
| Fat suppr.    | None |
| Restore magn. | Off  |
| Special sat.  | None |

**Geometry - Navigator**

**Geometry - Tim Planning Suite**

|                   |      |
|-------------------|------|
| Set-n-Go Protocol | Off  |
| Table position    | H    |
| Table position    | 0 mm |

**Geometry - Tim Planning Suite**

|                  |     |
|------------------|-----|
| Inline Composing | Off |
|------------------|-----|

**System - Miscellaneous**

|                     |                  |
|---------------------|------------------|
| Positioning mode    | FIX              |
| Table position      | H                |
| Table position      | 0 mm             |
| MSMA                | S - C - T        |
| Sagittal            | R >> L           |
| Coronal             | A >> P           |
| Transversal         | F >> H           |
| Coil Combine Mode   | Adaptive Combine |
| Save uncombined     | Off              |
| Matrix Optimization | Off              |
| AutoAlign           | ---              |
| Coil Select Mode    | Default          |

**System - Adjustments**

|                          |          |
|--------------------------|----------|
| B0 Shim mode             | Brain    |
| B1 Shim mode             | TrueForm |
| Confirm freq. adjustment | Off      |
| Assume Dominant Fat      | Off      |
| Assume Silicone          | Off      |
| Adjustment Tolerance     | Auto     |

**System - Adjust Volume**

|               |                    |
|---------------|--------------------|
| ! Position    | R0.9 P9.8 H15.0 mm |
| ! Orientation | T > C-16.4 > S-1.3 |
| ! Rotation    | 2.64 deg           |
| ! A >> P      | 163 mm             |
| ! R >> L      | 160 mm             |
| ! F >> H      | 111 mm             |
| Reset         | Off                |

**System - pTx Volumes**

|              |          |
|--------------|----------|
| B1 Shim mode | TrueForm |
| Excitation   | Non-sel. |

**System - Tx/Rx**

|                     |                |
|---------------------|----------------|
| Frequency 1H        | 297.231131 MHz |
| Correction factor   | 1              |
| Gain                | High           |
| Img. Scale Cor.     | 1.000          |
| Reset               | Off            |
| ? Ref. amplitude 1H | 0.000 V        |

**Physio - Signal1**

|                 |          |
|-----------------|----------|
| 1st Signal/Mode | None     |
| Trigger delay   | 0 ms     |
| TR              | 12000 ms |
| Concatenations  | 1        |

**Physio - Cardiac**

|                   |         |
|-------------------|---------|
| Magn. preparation | None    |
| Fat suppr.        | None    |
| Dark blood        | Off     |
| FoV read          | 230 mm  |
| FoV phase         | 100.0 % |
| Phase resolution  | 100 %   |

**Physio - PACE**

|                |     |
|----------------|-----|
| Resp. control  | Off |
| Concatenations | 1   |

**Inline - Common**

|                      |     |
|----------------------|-----|
| Subtract             | Off |
| Measurements         | 1   |
| StdDev               | Off |
| Save original images | On  |

**Inline - MIP**

|                      |     |
|----------------------|-----|
| MIP-Sag              | Off |
| MIP-Cor              | Off |
| MIP-Tra              | Off |
| MIP-Time             | Off |
| Save original images | On  |

**Inline - Composing**

|                  |     |
|------------------|-----|
| Inline Composing | Off |
| Distortion Corr. | Off |

**Sequence - Part 1**

|                     |           |
|---------------------|-----------|
| Introduction        | Off       |
| Dimension           | 3D        |
| Elliptical scanning | Off       |
| Reordering          | Linear    |
| Flow comp.          | No        |
| Echo spacing        | 3.52 ms   |
| Bandwidth           | 694 Hz/Px |

**Sequence - Part 2**

|                     |          |
|---------------------|----------|
| Echo train duration | 764 ms   |
| Gradient mode       | Fast     |
| Excitation          | Non-sel. |
| Flip angle mode     | T2 var   |
| Turbo factor        | 218      |

**Sequence - pTX Pulses**

|                 |            |
|-----------------|------------|
| Universal Pulse | 1          |
| Pulse type      | Excitation |
| Trajectory      | External   |

**Sequence - Assistant**

|               |     |
|---------------|-----|
| Allowed delay | 0 s |
|---------------|-----|

|                                                                                            |
|--------------------------------------------------------------------------------------------|
| \\USER\WBIC Protocols Ready\Protocol 569\P00569_Epilepsy_20230628\T2star_0.8iso_GRAPPA_2_2 |
| TA: 7:17 PM: FIX Voxel size: 0.8×0.8×0.8 mmPAT: 4 Rel. SNR: 1.00 : fl_r                    |

**Properties**

|                                               |                    |
|-----------------------------------------------|--------------------|
| Prio recon                                    | Off                |
| Load images to viewer                         | On                 |
| Inline movie                                  | Off                |
| Auto store images                             | On                 |
| Load images to stamp segments                 | Off                |
| Load images to graphic segments               | Off                |
| Auto open inline display                      | Off                |
| Auto close inline display                     | Off                |
| Start measurement without further preparation | Off                |
| Wait for user to start                        | Off                |
| Start measurements                            | Single measurement |

**Routine**

|                    |           |
|--------------------|-----------|
| Slab group         | 1         |
| Slabs              | 1         |
| Dist. factor       | 20 %      |
| Position           | Isocenter |
| Orientation        | Sagittal  |
| Phase enc. dir.    | A >> P    |
| AutoAlign          | ---       |
| Phase oversampling | 0 %       |
| Slice oversampling | 0.0 %     |
| Slices per slab    | 192       |
| FoV read           | 224 mm    |
| FoV phase          | 100.0 %   |
| Slice thickness    | 0.80 mm   |
| TR                 | 31.0 ms   |
| TE                 | 20.00 ms  |
| Averages           | 1         |
| Concatenations     | 1         |
| Filter             | None      |
| Coil elements      | AC        |

**Contrast - Common**

|                   |          |
|-------------------|----------|
| TR                | 31.0 ms  |
| TE                | 20.00 ms |
| MTC               | Off      |
| Magn. preparation | None     |
| Flip angle        | 15 deg   |
| Fat suppr.        | None     |
| Water suppr.      | None     |
| SWI               | Off      |

**Contrast - Dynamic**

|                 |                  |
|-----------------|------------------|
| Averages        | 1                |
| Averaging mode  | Short term       |
| Reconstruction  | Magn./Phase      |
| Measurements    | 1                |
| Multiple series | Each measurement |

**Resolution - Common**

|                       |         |
|-----------------------|---------|
| FoV read              | 224 mm  |
| FoV phase             | 100.0 % |
| Slice thickness       | 0.80 mm |
| Base resolution       | 280     |
| Phase resolution      | 100 %   |
| Slice resolution      | 100 %   |
| Phase partial Fourier | Off     |

**Resolution - Common**

|                       |     |
|-----------------------|-----|
| Slice partial Fourier | Off |
| Interpolation         | Off |

**Resolution - iPAT**

|                     |            |
|---------------------|------------|
| PAT mode            | GRAPPA     |
| Accel. factor PE    | 2          |
| Ref. lines PE       | 40         |
| Accel. factor 3D    | 2          |
| Ref. lines 3D       | 24         |
| Reference scan mode | Integrated |

**Resolution - Filter Image**

|                   |     |
|-------------------|-----|
| Image Filter      | Off |
| Distortion Corr.  | Off |
| Prescan Normalize | Off |
| Normalize         | Off |
| B1 filter         | Off |

**Resolution - Filter Rawdata**

|                   |     |
|-------------------|-----|
| Raw filter        | Off |
| Elliptical filter | Off |

**Geometry - Common**

|                    |             |
|--------------------|-------------|
| Slab group         | 1           |
| Slabs              | 1           |
| Dist. factor       | 20 %        |
| Position           | Isocenter   |
| Orientation        | Sagittal    |
| Phase enc. dir.    | A >> P      |
| Slice oversampling | 0.0 %       |
| Slices per slab    | 192         |
| FoV read           | 224 mm      |
| FoV phase          | 100.0 %     |
| Slice thickness    | 0.80 mm     |
| TR                 | 31.0 ms     |
| Multi-slice mode   | Interleaved |
| Series             | Interleaved |
| Concatenations     | 1           |

**Geometry - AutoAlign**

|                     |           |
|---------------------|-----------|
| Slab group          | 1         |
| Position            | Isocenter |
| Orientation         | Sagittal  |
| Phase enc. dir.     | A >> P    |
| AutoAlign           | ---       |
| Initial Position    | Isocenter |
| L                   | 0.0 mm    |
| P                   | 0.0 mm    |
| H                   | 0.0 mm    |
| Initial Rotation    | 0.00 deg  |
| Initial Orientation | Sagittal  |

**Geometry - Saturation**

|                 |          |
|-----------------|----------|
| Saturation mode | Standard |
| Fat suppr.      | None     |
| Water suppr.    | None     |
| Special sat.    | None     |

**Geometry - Tim Planning Suite**

|                   |      |
|-------------------|------|
| Set-n-Go Protocol | Off  |
| Table position    | H    |
| Table position    | 0 mm |
| Inline Composing  | Off  |

**Geometry - Tim CT**

|                 |         |
|-----------------|---------|
| Tim CT mode     | Off     |
| Slabs           | 1       |
| Slices per slab | 192     |
| Slice thickness | 0.80 mm |
| Dist. factor    | 20 %    |
| FoV read        | 224 mm  |
| FoV phase       | 100.0 % |
| Segments        | 1       |

**System - Miscellaneous**

|                     |                |
|---------------------|----------------|
| Positioning mode    | FIX            |
| Table position      | F              |
| Table position      | 0 mm           |
| MSMA                | S - C - T      |
| Sagittal            | R >> L         |
| Coronal             | A >> P         |
| Transversal         | F >> H         |
| Coil Combine Mode   | Sum of Squares |
| Save uncombined     | Off            |
| Matrix Optimization | Off            |
| AutoAlign           | ---            |
| Coil Select Mode    | Default        |

**System - Adjustments**

|                          |          |
|--------------------------|----------|
| B0 Shim mode             | Brain    |
| B1 Shim mode             | TrueForm |
| Confirm freq. adjustment | Off      |
| Assume Dominant Fat      | Off      |
| Assume Silicone          | Off      |
| Adjustment Tolerance     | None     |

**System - Adjust Volume**

|               |                    |
|---------------|--------------------|
| ! Position    | R0.9 P9.8 H15.0 mm |
| ! Orientation | T > C-16.4 > S-1.3 |
| ! Rotation    | 2.64 deg           |
| ! A >> P      | 163 mm             |
| ! R >> L      | 160 mm             |
| ! F >> H      | 111 mm             |
| Reset         | Off                |

**System - pTx Volumes**

|              |           |
|--------------|-----------|
| B1 Shim mode | TrueForm  |
| Excitation   | Slab-sel. |

**System - Tx/Rx**

|                     |                |
|---------------------|----------------|
| Frequency 1H        | 297.231131 MHz |
| Correction factor   | 1              |
| Gain                | High           |
| Img. Scale Cor.     | 1.000          |
| Reset               | Off            |
| ? Ref. amplitude 1H | 0.000 V        |

**Physio - Signal1**

|                 |         |
|-----------------|---------|
| 1st Signal/Mode | None    |
| TR              | 31.0 ms |
| Concatenations  | 1       |
| Segments        | 1       |

**Physio - Cardiac**

|                   |         |
|-------------------|---------|
| Tagging           | None    |
| Magn. preparation | None    |
| Fat suppr.        | None    |
| Dark blood        | Off     |
| FoV read          | 224 mm  |
| FoV phase         | 100.0 % |
| Phase resolution  | 100 %   |

**Physio - PACE**

|                |     |
|----------------|-----|
| Resp. control  | Off |
| Concatenations | 1   |

**Inline - Common**

|                      |     |
|----------------------|-----|
| Subtract             | Off |
| Measurements         | 1   |
| StdDev               | Off |
| Liver registration   | Off |
| Save original images | On  |

**Inline - MIP**

|                      |     |
|----------------------|-----|
| MIP-Sag              | Off |
| MIP-Cor              | Off |
| MIP-Tra              | Off |
| MIP-Time             | Off |
| Save original images | On  |

**Inline - Soft Tissue**

|              |     |
|--------------|-----|
| Wash - In    | Off |
| Wash - Out   | Off |
| TTP          | Off |
| PEI          | Off |
| MIP - time   | Off |
| Measurements | 1   |

**Inline - Composing**

|                  |     |
|------------------|-----|
| Inline Composing | Off |
| Distortion Corr. | Off |

**Inline - MapIt**

|                      |          |
|----------------------|----------|
| Save original images | On       |
| MapIt                | None     |
| Flip angle           | 15 deg   |
| Measurements         | 1        |
| Contrasts            | 1        |
| TR                   | 31.0 ms  |
| TE                   | 20.00 ms |

**Sequence - Part 1**

|                     |             |
|---------------------|-------------|
| Introduction        | On          |
| Dimension           | 3D          |
| Elliptical scanning | Off         |
| Phase stabilisation | Off         |
| Asymmetric echo     | Off         |
| Contrasts           | 1           |
| Flow comp.          | Slice/Read  |
| Multi-slice mode    | Interleaved |
| Bandwidth           | 80 Hz/Px    |

**Sequence - Part 2**

|                          |        |
|--------------------------|--------|
| Segments                 | 1      |
| Acoustic noise reduction | None   |
| RF pulse type            | Normal |
| Gradient mode            | Fast   |

**Sequence - Part 2**

|             |           |
|-------------|-----------|
| Excitation  | Slab-sel. |
| RF spoiling | On        |

**Sequence - Assistant**

|      |     |
|------|-----|
| Mode | Off |
|------|-----|

\USER\WBIC Protocols Ready\Protocol 569\P00569\_Epilepsy\_20230628\dark-fluid\_spcR\_sag\_p6\_0.

8

TA: 7:23 PM: FIX Voxel size: 0.8x0.8x0.8 mmPAT: 6 Rel. SNR: 1.00 : spcir

**Properties**

|                                               |                    |
|-----------------------------------------------|--------------------|
| Prio recon                                    | Off                |
| Load images to viewer                         | On                 |
| Inline movie                                  | Off                |
| Auto store images                             | On                 |
| Load images to stamp segments                 | Off                |
| Load images to graphic segments               | Off                |
| Auto open inline display                      | Off                |
| Auto close inline display                     | Off                |
| Start measurement without further preparation | Off                |
| Wait for user to start                        | Off                |
| Start measurements                            | Single measurement |

**Routine**

|                    |           |
|--------------------|-----------|
| Slab group         | 1         |
| Slabs              | 1         |
| Position           | Isocenter |
| Orientation        | Sagittal  |
| Phase enc. dir.    | A >> P    |
| AutoAlign          | ---       |
| Phase oversampling | 0 %       |
| Slice oversampling | 8.3 %     |
| Slices per slab    | 192       |
| FoV read           | 230 mm    |
| FoV phase          | 100.0 %   |
| Slice thickness    | 0.80 mm   |
| TR                 | 9000 ms   |
| TE                 | 269 ms    |
| Averages           | 1.0       |
| Concatenations     | 1         |
| Filter             | B1 filter |
| Coil elements      | AC        |

**Contrast - Common**

|                   |                |
|-------------------|----------------|
| TR                | 9000 ms        |
| TE                | 269 ms         |
| MTC               | Off            |
| Magn. preparation | Non-sel. T2-IR |
| TI 1              | 2600 ms        |
| Fat suppr.        | None           |
| Blood suppr.      | Off            |
| Restore magn.     | Off            |

**Contrast - Dynamic**

|                 |                  |
|-----------------|------------------|
| Averages        | 1.0              |
| Reconstruction  | Magnitude        |
| Measurements    | 1                |
| Multiple series | Each measurement |

**Resolution - Common**

|                       |         |
|-----------------------|---------|
| FoV read              | 230 mm  |
| FoV phase             | 100.0 % |
| Slice thickness       | 0.80 mm |
| Base resolution       | 288     |
| Phase resolution      | 100 %   |
| Slice resolution      | 100 %   |
| Phase partial Fourier | Allowed |
| Slice partial Fourier | Off     |
| Interpolation         | Off     |

**Resolution - iPAT**

|                     |            |
|---------------------|------------|
| PAT mode            | CAIPIRINHA |
| Accel. factor PE    | 3          |
| Ref. lines PE       | 32         |
| Accel. factor 3D    | 2          |
| Ref. lines 3D       | 24         |
| Reordering Shift 3D | 1          |
| Reference scan mode | Integrated |

**Resolution - Filter Image**

|                   |     |
|-------------------|-----|
| Image Filter      | Off |
| Distortion Corr.  | Off |
| Prescan Normalize | Off |
| Normalize         | Off |
| B1 filter         | On  |
| Unfiltered images | Off |

**Resolution - Filter Rawdata**

|                   |     |
|-------------------|-----|
| Raw filter        | Off |
| Elliptical filter | Off |

**Geometry - Common**

|                    |           |
|--------------------|-----------|
| Slab group         | 1         |
| Slabs              | 1         |
| Position           | Isocenter |
| Orientation        | Sagittal  |
| Phase enc. dir.    | A >> P    |
| Slice oversampling | 8.3 %     |
| Slices per slab    | 192       |
| FoV read           | 230 mm    |
| FoV phase          | 100.0 %   |
| Slice thickness    | 0.80 mm   |
| TR                 | 9000 ms   |
| Series             | Ascending |
| Concatenations     | 1         |

**Geometry - AutoAlign**

|                     |           |
|---------------------|-----------|
| Slab group          | 1         |
| Position            | Isocenter |
| Orientation         | Sagittal  |
| Phase enc. dir.     | A >> P    |
| AutoAlign           | ---       |
| Initial Position    | Isocenter |
| L                   | 0.0 mm    |
| P                   | 0.0 mm    |
| H                   | 0.0 mm    |
| Initial Rotation    | 0.00 deg  |
| Initial Orientation | Sagittal  |

**Geometry - Saturation**

|               |      |
|---------------|------|
| Fat suppr.    | None |
| Restore magn. | Off  |
| Special sat.  | None |

**Geometry - Navigator****Geometry - Tim Planning Suite**

|                   |     |
|-------------------|-----|
| Set-n-Go Protocol | Off |
| Table position    | H   |

**Geometry - Tim Planning Suite**

|                  |      |
|------------------|------|
| Table position   | 0 mm |
| Inline Composing | Off  |

**System - Miscellaneous**

|                     |                  |
|---------------------|------------------|
| Positioning mode    | FIX              |
| Table position      | H                |
| Table position      | 0 mm             |
| MSMA                | S - C - T        |
| Sagittal            | R >> L           |
| Coronal             | A >> P           |
| Transversal         | F >> H           |
| Coil Combine Mode   | Adaptive Combine |
| Save uncombined     | Off              |
| Matrix Optimization | Off              |
| AutoAlign           | ---              |
| Coil Select Mode    | Default          |

**System - Adjustments**

|                          |          |
|--------------------------|----------|
| B0 Shim mode             | Brain    |
| B1 Shim mode             | TrueForm |
| Confirm freq. adjustment | Off      |
| Assume Dominant Fat      | Off      |
| Assume Silicone          | Off      |
| Adjustment Tolerance     | Auto     |

**System - Adjust Volume**

|               |                    |
|---------------|--------------------|
| ! Position    | R0.9 P9.8 H15.0 mm |
| ! Orientation | T > C-16.4 > S-1.3 |
| ! Rotation    | 2.64 deg           |
| ! A >> P      | 163 mm             |
| ! R >> L      | 160 mm             |
| ! F >> H      | 111 mm             |
| Reset         | Off                |

**System - pTx Volumes**

|              |          |
|--------------|----------|
| B1 Shim mode | TrueForm |
| Excitation   | Non-sel. |

**System - Tx/Rx**

|                     |                |
|---------------------|----------------|
| Frequency 1H        | 297.231131 MHz |
| Correction factor   | 1              |
| Gain                | High           |
| Img. Scale Cor.     | 5.000          |
| Reset               | Off            |
| ? Ref. amplitude 1H | 0.000 V        |

**Physio - Signal1**

|                 |         |
|-----------------|---------|
| 1st Signal/Mode | None    |
| Trigger delay   | 0 ms    |
| TR              | 9000 ms |
| Concatenations  | 1       |

**Physio - Cardiac**

|                   |                |
|-------------------|----------------|
| Magn. preparation | Non-sel. T2-IR |
| TI 1              | 2600 ms        |
| Fat suppr.        | None           |
| Dark blood        | Off            |
| FoV read          | 230 mm         |
| FoV phase         | 100.0 %        |
| Phase resolution  | 100 %          |

**Physio - PACE**

|               |     |
|---------------|-----|
| Resp. control | Off |
|---------------|-----|

**Physio - PACE**

|                |   |
|----------------|---|
| Concatenations | 1 |
|----------------|---|

**Inline - Common**

|                      |     |
|----------------------|-----|
| Subtract             | Off |
| Measurements         | 1   |
| StdDev               | Off |
| Save original images | On  |

**Inline - MIP**

|                      |     |
|----------------------|-----|
| MIP-Sag              | Off |
| MIP-Cor              | Off |
| MIP-Tra              | Off |
| MIP-Time             | Off |
| Save original images | On  |

**Inline - Composing**

|                  |     |
|------------------|-----|
| Inline Composing | Off |
| Distortion Corr. | Off |

**Sequence - Part 1**

|                     |           |
|---------------------|-----------|
| Introduction        | On        |
| Dimension           | 3D        |
| Elliptical scanning | Off       |
| Reordering          | Linear    |
| Flow comp.          | No        |
| Echo spacing        | 3.32 ms   |
| Adiabatic-mode      | Off       |
| Bandwidth           | 723 Hz/Px |

**Sequence - Part 2**

|                     |          |
|---------------------|----------|
| Echo train duration | 631 ms   |
| RF pulse type       | Normal   |
| Gradient mode       | Fast     |
| Excitation          | Non-sel. |
| Flip angle mode     | T2 var   |
| Turbo factor        | 220      |

**Sequence - Assistant**

|               |       |
|---------------|-------|
| Allowed delay | 120 s |
|---------------|-------|

\USER\WBIC Protocols Ready\Protocol 569\P00569\_Epilepsy\_20230628\mp2rage\_sag\_p3\_0.8mm

TA: 8:33 PM: REF Voxel size: 0.8×0.8×0.8 mmPAT: 3 Rel. SNR: 1.00 : tfl

**Properties**

|                                               |                    |
|-----------------------------------------------|--------------------|
| Prio recon                                    | Off                |
| Load images to viewer                         | On                 |
| Inline movie                                  | Off                |
| Auto store images                             | On                 |
| Load images to stamp segments                 | Off                |
| Load images to graphic segments               | Off                |
| Auto open inline display                      | Off                |
| Auto close inline display                     | Off                |
| Start measurement without further preparation | Off                |
| Wait for user to start                        | Off                |
| Start measurements                            | Single measurement |

**Routine**

|                    |           |
|--------------------|-----------|
| Slab group         | 1         |
| Slabs              | 1         |
| Dist. factor       | 50 %      |
| Position           | Isocenter |
| Orientation        | Sagittal  |
| Phase enc. dir.    | A >> P    |
| AutoAlign          | ---       |
| Phase oversampling | 0 %       |
| Slice oversampling | 0.0 %     |
| Slices per slab    | 192       |
| FoV read           | 240 mm    |
| FoV phase          | 100.0 %   |
| Slice thickness    | 0.80 mm   |
| TR                 | 4300.0 ms |
| TE                 | 1.99 ms   |
| Averages           | 1         |
| Concatenations     | 1         |
| Filter             | None      |
| Coil elements      | AC        |

**Contrast - Common**

|                   |                   |
|-------------------|-------------------|
| TR                | 4300.0 ms         |
| TE                | 1.99 ms           |
| Magn. preparation | Non-sel. IR       |
| TI 1              | 840 ms            |
| TI 2              | 2370 ms           |
| Flip angle 1      | 5.0 deg           |
| Flip angle 2      | 6.0 deg           |
| Fat suppr.        | Water excit. fast |
| Water suppr.      | None              |

**Contrast - Dynamic**

|                 |                  |
|-----------------|------------------|
| Averages        | 1                |
| Averaging mode  | Long term        |
| Reconstruction  | Magnitude        |
| Measurements    | 1                |
| Multiple series | Each measurement |

**Resolution - Common**

|                       |         |
|-----------------------|---------|
| FoV read              | 240 mm  |
| FoV phase             | 100.0 % |
| Slice thickness       | 0.80 mm |
| Base resolution       | 288     |
| Phase resolution      | 100 %   |
| Slice resolution      | 100 %   |
| Phase partial Fourier | Off     |

**Resolution - Common**

|                       |     |
|-----------------------|-----|
| Slice partial Fourier | 6/8 |
| Interpolation         | Off |

**Resolution - iPAT**

|                     |            |
|---------------------|------------|
| PAT mode            | GRAPPA     |
| Accel. factor PE    | 3          |
| Ref. lines PE       | 36         |
| Accel. factor 3D    | 1          |
| Reference scan mode | Integrated |

**Resolution - Filter Image**

|                   |     |
|-------------------|-----|
| Image Filter      | Off |
| Distortion Corr.  | Off |
| Prescan Normalize | Off |
| Normalize         | Off |
| B1 filter         | Off |

**Resolution - Filter Rawdata**

|                   |     |
|-------------------|-----|
| Raw filter        | Off |
| Elliptical filter | Off |

**Geometry - Common**

|                    |             |
|--------------------|-------------|
| Slab group         | 1           |
| Slabs              | 1           |
| Dist. factor       | 50 %        |
| Position           | Isocenter   |
| Orientation        | Sagittal    |
| Phase enc. dir.    | A >> P      |
| Slice oversampling | 0.0 %       |
| Slices per slab    | 192         |
| FoV read           | 240 mm      |
| FoV phase          | 100.0 %     |
| Slice thickness    | 0.80 mm     |
| TR                 | 4300.0 ms   |
| Multi-slice mode   | Single shot |
| Series             | Interleaved |
| Concatenations     | 1           |

**Geometry - AutoAlign**

|                     |           |
|---------------------|-----------|
| Slab group          | 1         |
| Position            | Isocenter |
| Orientation         | Sagittal  |
| Phase enc. dir.     | A >> P    |
| AutoAlign           | ---       |
| Initial Position    | Isocenter |
| L                   | 0.0 mm    |
| P                   | 0.0 mm    |
| H                   | 0.0 mm    |
| Initial Rotation    | 21.00 deg |
| Initial Orientation | Sagittal  |

**Geometry - Navigator****Geometry - Tim Planning Suite**

|                   |      |
|-------------------|------|
| Set-n-Go Protocol | Off  |
| Table position    | H    |
| Table position    | 0 mm |
| Inline Composing  | Off  |

**System - Miscellaneous**

|                     |                |
|---------------------|----------------|
| Positioning mode    | REF            |
| Table position      | H              |
| Table position      | 0 mm           |
| MSMA                | S - C - T      |
| Sagittal            | R >> L         |
| Coronal             | A >> P         |
| Transversal         | F >> H         |
| Coil Combine Mode   | Sum of Squares |
| Save uncombined     | Off            |
| Matrix Optimization | Off            |
| AutoAlign           | ---            |
| Coil Select Mode    | Default        |

**System - Adjustments**

|                          |          |
|--------------------------|----------|
| B0 Shim mode             | Brain    |
| B1 Shim mode             | TrueForm |
| Confirm freq. adjustment | Off      |
| Assume Dominant Fat      | Off      |
| Assume Silicone          | Off      |
| Adjustment Tolerance     | Auto     |

**System - Adjust Volume**

|               |                    |
|---------------|--------------------|
| ! Position    | R0.9 P9.8 H15.0 mm |
| ! Orientation | T > C-16.4 > S-1.3 |
| ! Rotation    | 2.64 deg           |
| ! A >> P      | 163 mm             |
| ! R >> L      | 160 mm             |
| ! F >> H      | 111 mm             |
| Reset         | Off                |

**System - pTx Volumes**

|              |          |
|--------------|----------|
| B1 Shim mode | TrueForm |
| Excitation   | Non-sel. |

**System - Tx/Rx**

|                     |                |
|---------------------|----------------|
| Frequency 1H        | 297.231131 MHz |
| Correction factor   | 1              |
| Gain                | High           |
| Img. Scale Cor.     | 1.000          |
| Reset               | Off            |
| ? Ref. amplitude 1H | 0.000 V        |

**Physio - Signal1**

|                 |           |
|-----------------|-----------|
| 1st Signal/Mode | None      |
| TR              | 4300.0 ms |
| Concatenations  | 1         |

**Physio - Cardiac**

|                   |                   |
|-------------------|-------------------|
| Magn. preparation | Non-sel. IR       |
| TI 1              | 840 ms            |
| TI 2              | 2370 ms           |
| Fat suppr.        | Water excit. fast |
| Dark blood        | Off               |
| FoV read          | 240 mm            |
| FoV phase         | 100.0 %           |
| Phase resolution  | 100 %             |

**Physio - PACE**

|                |     |
|----------------|-----|
| Resp. control  | Off |
| Concatenations | 1   |

**Inline - Common**

|          |     |
|----------|-----|
| Subtract | Off |
|----------|-----|

**Inline - Common**

|                      |     |
|----------------------|-----|
| Measurements         | 1   |
| StdDev               | Off |
| Save original images | On  |

**Inline - MIP**

|                      |     |
|----------------------|-----|
| MIP-Sag              | Off |
| MIP-Cor              | Off |
| MIP-Tra              | Off |
| MIP-Time             | Off |
| Save original images | On  |

**Inline - Composing**

|                  |     |
|------------------|-----|
| Inline Composing | Off |
| Distortion Corr. | Off |

**Inline - Maplt**

|                      |           |
|----------------------|-----------|
| Save original images | On        |
| Maplt                | None      |
| Flip angle 1         | 5.0 deg   |
| Flip angle 2         | 6.0 deg   |
| Measurements         | 1         |
| TR                   | 4300.0 ms |
| TE                   | 1.99 ms   |

**Sequence - Part 1**

|                     |             |
|---------------------|-------------|
| Introduction        | On          |
| Dimension           | 3D          |
| Elliptical scanning | Off         |
| Reordering          | Linear      |
| Asymmetric echo     | Allowed     |
| Flow comp.          | No          |
| Multi-slice mode    | Single shot |
| Echo spacing        | 6.3 ms      |
| Bandwidth           | 250 Hz/Px   |

**Sequence - Part 2**

|                         |          |
|-------------------------|----------|
| RF pulse type           | Fast     |
| Gradient mode           | Fast*    |
| Excitation              | Non-sel. |
| RF spoiling             | On       |
| Incr. Gradient spoiling | Off      |
| Turbo factor            | 144      |

**Sequence - Assistant**

|      |     |
|------|-----|
| Mode | Off |
|------|-----|

\\USER\WBIC Protocols Ready\Protocol 569\I00569\_Epilepsy\_20230628\extra\_ep2d\_diff\_PTX

TA: 3:57 PM: FIX Voxel size: 1.3×1.3×1.3 mmPAT: 3 Rel. SNR: 1.00 : epse

**Properties**

|                                               |                    |
|-----------------------------------------------|--------------------|
| Prio recon                                    | Off                |
| Load images to viewer                         | On                 |
| Inline movie                                  | Off                |
| Auto store images                             | On                 |
| Load images to stamp segments                 | Off                |
| Load images to graphic segments               | Off                |
| Auto open inline display                      | Off                |
| Auto close inline display                     | Off                |
| Start measurement without further preparation | Off                |
| Wait for user to start                        | Off                |
| Start measurements                            | Single measurement |

**Routine**

|                    |                   |
|--------------------|-------------------|
| Slice group        | 1                 |
| Slices             | 60                |
| Dist. factor       | 0 %               |
| Position           | L0.0 P0.6 H7.3 mm |
| Orientation        | Transversal       |
| Phase enc. dir.    | A >> P            |
| AutoAlign          | ---               |
| Phase oversampling | 0 %               |
| FoV read           | 210 mm            |
| FoV phase          | 100.0 %           |
| Slice thickness    | 1.25 mm           |
| TR                 | 6400 ms           |
| TE                 | 65.0 ms           |
| Concatenations     | 1                 |
| Filter             | None              |
| Coil elements      | AC                |

**Contrast - Common**

|                    |          |
|--------------------|----------|
| TR                 | 6400 ms  |
| TE                 | 65.0 ms  |
| MTC                | Off      |
| Magn. preparation  | None     |
| Flip angle exc     | 90 deg   |
| Flip angle fat sat | 110 deg  |
| Fat suppr.         | Fat sat. |
| Fat sat. mode      | Weak     |

**Contrast - Dynamic**

|                 |           |
|-----------------|-----------|
| Averaging mode  | Long term |
| Reconstruction  | Magnitude |
| Measurements    | 1         |
| Delay in TR     | 0 ms      |
| Multiple series | Off       |

**Resolution - Common**

|                       |         |
|-----------------------|---------|
| FoV read              | 210 mm  |
| FoV phase             | 100.0 % |
| Slice thickness       | 1.25 mm |
| Base resolution       | 168     |
| Phase resolution      | 100 %   |
| Phase partial Fourier | 6/8     |
| Interpolation         | Off     |

**Resolution - iPAT**

|                  |        |
|------------------|--------|
| Accel. mode      | GRAPPA |
| Accel. factor PE | 3      |

**Resolution - iPAT**

|                     |              |
|---------------------|--------------|
| Ref. lines PE       | 66           |
| Reference scan mode | GRE/separate |

**Resolution - Filter Image**

|                     |     |
|---------------------|-----|
| Distortion Corr.    | Off |
| Prescan Normalize   | Off |
| Dynamic Field Corr. | Off |

**Resolution - Filter Rawdata**

|                   |     |
|-------------------|-----|
| Raw filter        | Off |
| Elliptical filter | Off |

**Geometry - Common**

|                  |                   |
|------------------|-------------------|
| Slice group      | 1                 |
| Slices           | 60                |
| Dist. factor     | 0 %               |
| Position         | L0.0 P0.6 H7.3 mm |
| Orientation      | Transversal       |
| Phase enc. dir.  | A >> P            |
| FoV read         | 210 mm            |
| FoV phase        | 100.0 %           |
| Slice thickness  | 1.25 mm           |
| TR               | 6400 ms           |
| Multi-slice mode | Interleaved       |
| Series           | Interleaved       |
| Concatenations   | 1                 |

**Geometry - AutoAlign**

|                     |                   |
|---------------------|-------------------|
| Slice group         | 1                 |
| Position            | L0.0 P0.6 H7.3 mm |
| Orientation         | Transversal       |
| Phase enc. dir.     | A >> P            |
| AutoAlign           | ---               |
| Initial Position    | L0.0 P0.6 H7.3    |
| L                   | 0.0 mm            |
| P                   | 0.6 mm            |
| H                   | 7.3 mm            |
| Initial Rotation    | 0.00 deg          |
| Initial Orientation | Transversal       |

**Geometry - Saturation**

|               |          |
|---------------|----------|
| Fat suppr.    | Fat sat. |
| Fat sat. mode | Weak     |
| Special sat.  | None     |

**Geometry - Navigator****Geometry - Tim Planning Suite**

|                   |      |
|-------------------|------|
| Set-n-Go Protocol | Off  |
| Table position    | H    |
| Table position    | 0 mm |
| Inline Composing  | Off  |

**System - Miscellaneous**

|                  |           |
|------------------|-----------|
| Positioning mode | FIX       |
| Table position   | H         |
| Table position   | 0 mm      |
| MSMA             | S - C - T |
| Sagittal         | R >> L    |

**System - Miscellaneous**

|                     |                |
|---------------------|----------------|
| Coronal             | A >> P         |
| Transversal         | F >> H         |
| Coil Combine Mode   | Sum of Squares |
| Matrix Optimization | Off            |
| AutoAlign           | ---            |
| Coil Select Mode    | Default        |

**System - Adjustments**

|                          |          |
|--------------------------|----------|
| B0 Shim mode             | Brain    |
| B1 Shim mode             | TrueForm |
| Confirm freq. adjustment | Off      |
| Assume Dominant Fat      | Off      |
| Assume Silicone          | Off      |
| Adjustment Tolerance     | Auto     |

**System - Adjust Volume**

|               |                    |
|---------------|--------------------|
| ! Position    | R0.9 P9.8 H15.0 mm |
| ! Orientation | T > C-16.4 > S-1.3 |
| ! Rotation    | 2.64 deg           |
| ! A >> P      | 163 mm             |
| ! R >> L      | 160 mm             |
| ! F >> H      | 111 mm             |
| Reset         | Off                |

**System - pTx Volumes**

|              |          |
|--------------|----------|
| B1 Shim mode | TrueForm |
| Excitation   | Standard |

**System - Tx/Rx**

|                     |                |
|---------------------|----------------|
| Frequency 1H        | 297.231131 MHz |
| Correction factor   | 1              |
| Gain                | High           |
| Img. Scale Cor.     | 1.000          |
| Reset               | Off            |
| ? Ref. amplitude 1H | 0.000 V        |

**Physio - Signal1**

|                 |         |
|-----------------|---------|
| 1st Signal/Mode | None    |
| TR              | 6400 ms |
| Concatenations  | 1       |

**Physio - PACE**

|                |     |
|----------------|-----|
| Resp. control  | Off |
| Concatenations | 1   |

**Diff - Neuro**

|                       |                        |
|-----------------------|------------------------|
| Diffusion mode        | Free                   |
| Diff. directions      | 30                     |
| Diffusion Scheme      | Monopolar              |
| Diff. weightings      | 2                      |
| b-value 1             | 0 s/mm <sup>2</sup>    |
| b-value 2             | 1000 s/mm <sup>2</sup> |
| b-value 1             | 2                      |
| b-value 2             | 1                      |
| Diff. weighted images | On                     |
| Trace weighted images | On                     |
| ADC maps              | On                     |
| FA maps               | On                     |
| Mosaic                | Off                    |
| Tensor                | On                     |
| Noise level           | 40                     |

**Diff - Body**

|                       |                        |
|-----------------------|------------------------|
| Diffusion mode        | Free                   |
| Diff. directions      | 30                     |
| Diffusion Scheme      | Monopolar              |
| Diff. weightings      | 2                      |
| b-value 1             | 0 s/mm <sup>2</sup>    |
| b-value 2             | 1000 s/mm <sup>2</sup> |
| b-value 1             | 2                      |
| b-value 2             | 1                      |
| Diff. weighted images | On                     |
| Trace weighted images | On                     |
| ADC maps              | On                     |
| Exponential ADC Maps  | Off                    |
| FA maps               | On                     |
| Invert Gray Scale     | Off                    |
| Calculated Image      | Off                    |
| b-Value >=            | 0 s/mm <sup>2</sup>    |
| Noise level           | 40                     |

**Diff - Composing**

|                  |     |
|------------------|-----|
| Inline Composing | Off |
| Distortion Corr. | Off |

**Sequence - Part 1**

|                   |             |
|-------------------|-------------|
| Introduction      | On          |
| Optimization      | None        |
| Multi-slice mode  | Interleaved |
| Free echo spacing | Off         |
| Echo spacing      | 0.81 ms     |
| Bandwidth         | 1418 Hz/Px  |

**Sequence - Part 2**

|               |          |
|---------------|----------|
| EPI factor    | 168      |
| RF pulse type | Low SAR  |
| Gradient mode | Normal   |
| Excitation    | Standard |

**Sequence - pTX Pulses****Sequence - Special**

|                     |          |
|---------------------|----------|
| Use ptx pulse       | On       |
| Exc. pul. dur       | 10300 us |
| Refoc. pul. dur     | 11900 us |
| Exc. pul. phase     | 90 deg   |
| Refoc. pul. phase   | 0 deg    |
| Exc. pul. TE con.   | 3120 us  |
| Refoc. pul. TE con. | 2560 us  |
| n(exc. pulses)      | 1        |
| n(refoc. pulses)    | 1        |
